# Supplementary material for: Comparative outcomes of the voltage-dependent current density, charge transportation and rectification ratio of electronic devices fabricated using mechanically flexible supramolecular networks
Source: Royal Society of Chemistry journal article supplement (doi:10.1039/d4dt00383g), 2024-01-01
Supplement: d4dt00383g1.pdf [file d4dt00383g1.pdf]

## Electronic Supplementary Information

**Comparative outcomes of voltage-dependent current density, charge transportation and rectification ratio of fabricated electronic devices by mechanically flexible supramolecular network**

Baishakhi Pal,<sup>a</sup> Santanu Majumdar,<sup>b</sup> Indrajit Pal,<sup>b</sup> Gerald Lepcha,<sup>b</sup> Amiya Dey,<sup>b</sup> Partha Pratim Ray,<sup>a,\*</sup> Biswajit Dey<sup>b,\*</sup>

<sup>a</sup>Department of Physics, Jadavpur University, Kolkata 700032, India

<sup>b</sup>Department of Chemistry, Visva-Bharati University, Santiniketan 731235, India

\*E-mail: bdeychem@gmail.com, biswajit.dey@visva-bharati.ac.in (B.D.);  
parthap.ray@jadavpuruniversity.in (P.P.R.)

## 1. Minimum Critical Gelation Concentration (MGC) for the Synthesis of Mn-BDA and Cd-BDA Metallogel.

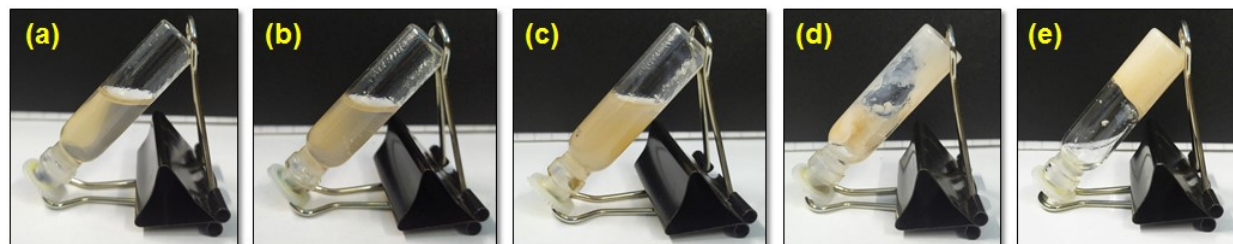

**Fig. S1** Determination of Minimum Critical Gelation Concentration (MCG) of the Mn-BDA metallogel with step-wise photography (a-e) of Mn-BDA metallogel-forming chemical constituents having varied concentrations.

**Table S1** Determination of Minimum Critical Gelation Concentration of the Mn-BDA

| Serial No. | [Mn(OAc) <sub>2</sub> ·4H <sub>2</sub> O]<br>(in 1 ml DMF) | [BDA]<br>(in 1 ml DMF) | Phase       |
|------------|------------------------------------------------------------|------------------------|-------------|
| 1          | 12.3 mg/ml                                                 | 7.3 mg/ml              | Sol         |
| 2          | 19.6 mg/ml                                                 | 11.7 mg/ml             | Sol         |
| 3          | 24.5 mg/ml                                                 | 14.6 mg/ml             | Viscous sol |
| 4          | 49.1 mg/ml                                                 | 29.3 mg/ml             | Weak gel    |
| 5          | 73.6 mg/ml                                                 | 43.9 mg/ml             | Gel         |

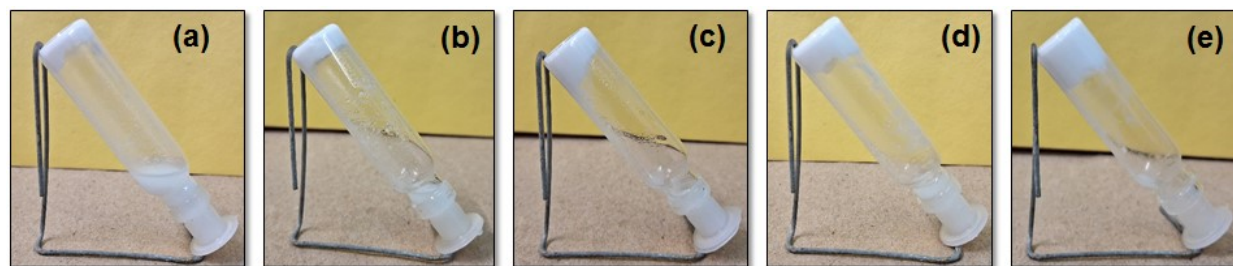

**Fig. S2** Determination of Minimum Critical Gelation Concentration of the Cd-BDA metallogel with step-wise photography of Cd-BDA metallogel-forming chemical constituents having varied concentrations.

**Table S2** Determination of Minimum Critical Gelation Concentration of the Cd-BDA

| Serial No. | [Cd(OAc) <sub>2</sub> ·2H <sub>2</sub> O] (in 1 ml DMF) | [Gelator] (in 1 ml DMF) | Phase            |
|------------|---------------------------------------------------------|-------------------------|------------------|
| 1          | 266.5 mg/ml                                             | 146.2 mg/ml             | Sol              |
| 2          | 319.8 mg/ml                                             | 175.4 mg/ml             | Viscous Sol      |
| 3          | 399.8 mg/ml                                             | 219.2 mg/ml             | Viscous sol      |
| 4          | 453.1 mg/ml                                             | 248.5 mg/ml             | More viscous sol |
| 5          | 533.1 mg/ml                                             | 292.3 mg/ml             | Gel              |

**2. Testing of gel forming ability of different solvents in forming stable metallogel of Mn-BDA, and Cd-BDA.**

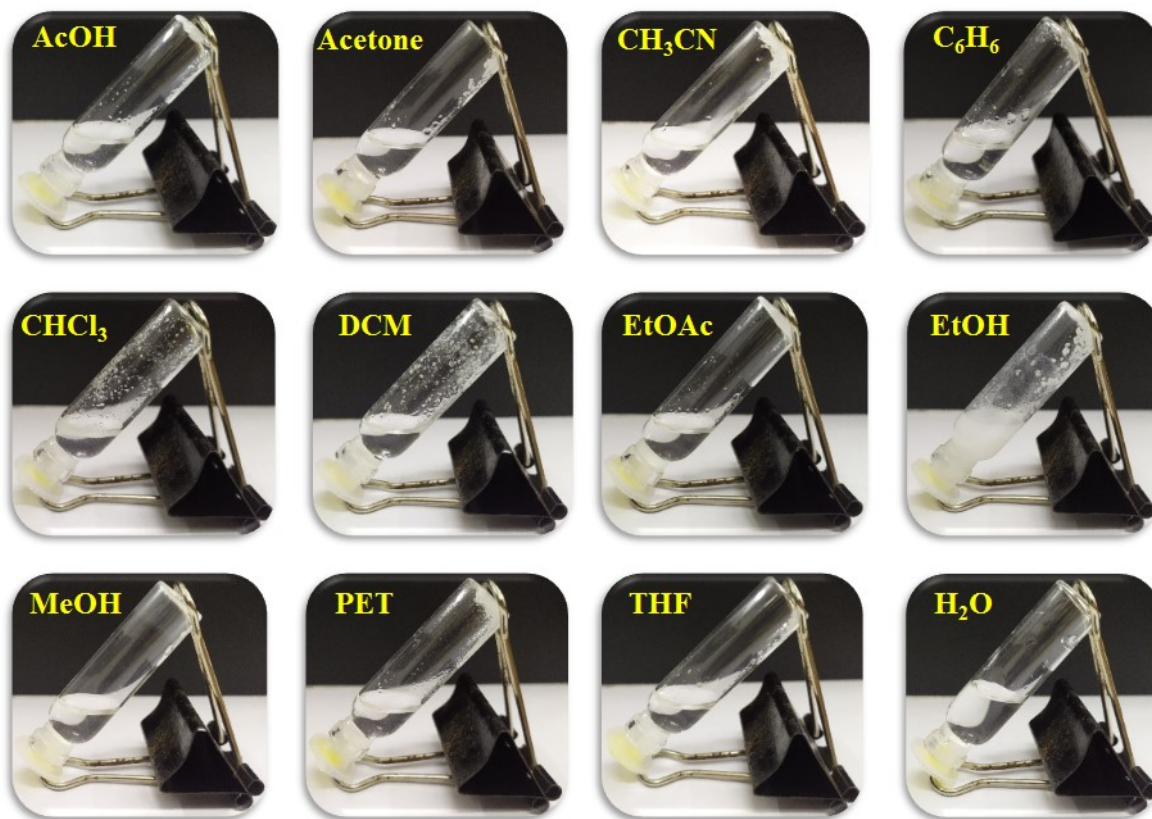

**Fig. S3** Role of versatile solvents in forming stable metallogel of Mn-BDA.

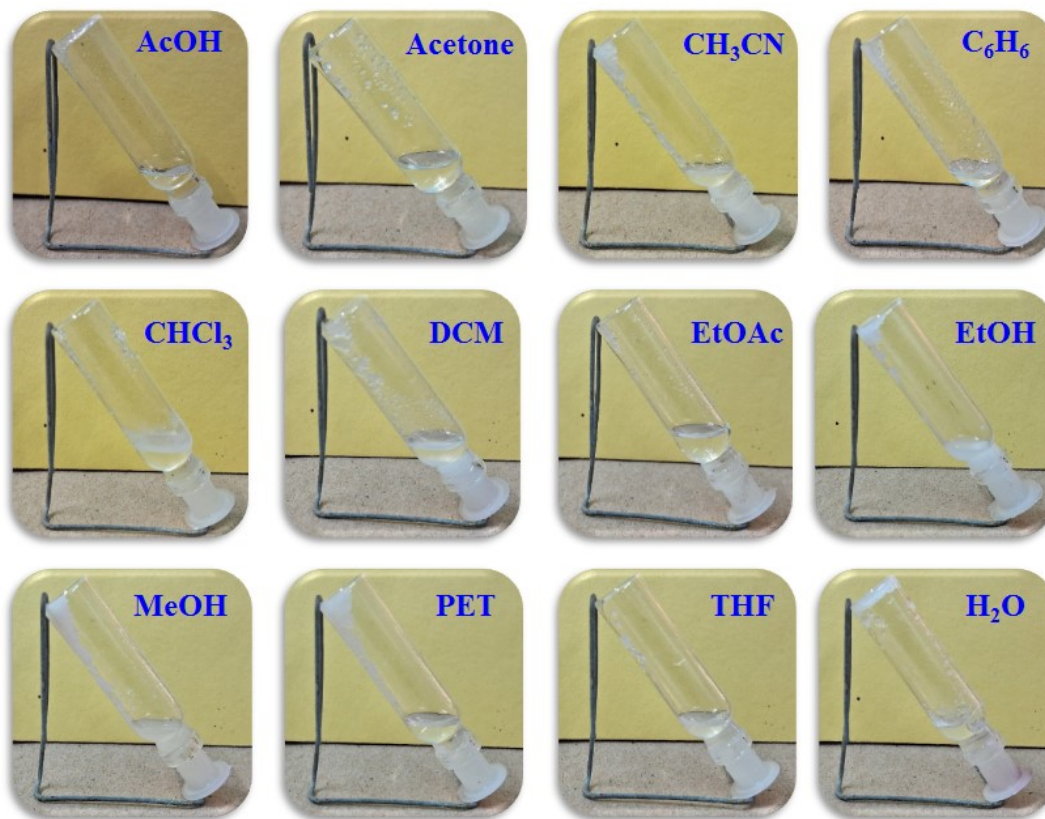

**Fig. S4** Role of versatile solvents in forming stable metallogel of Cd-BDA.



### 3. EDS elemental analyses of Mn-BDA, and Cd-BDA metallogels.

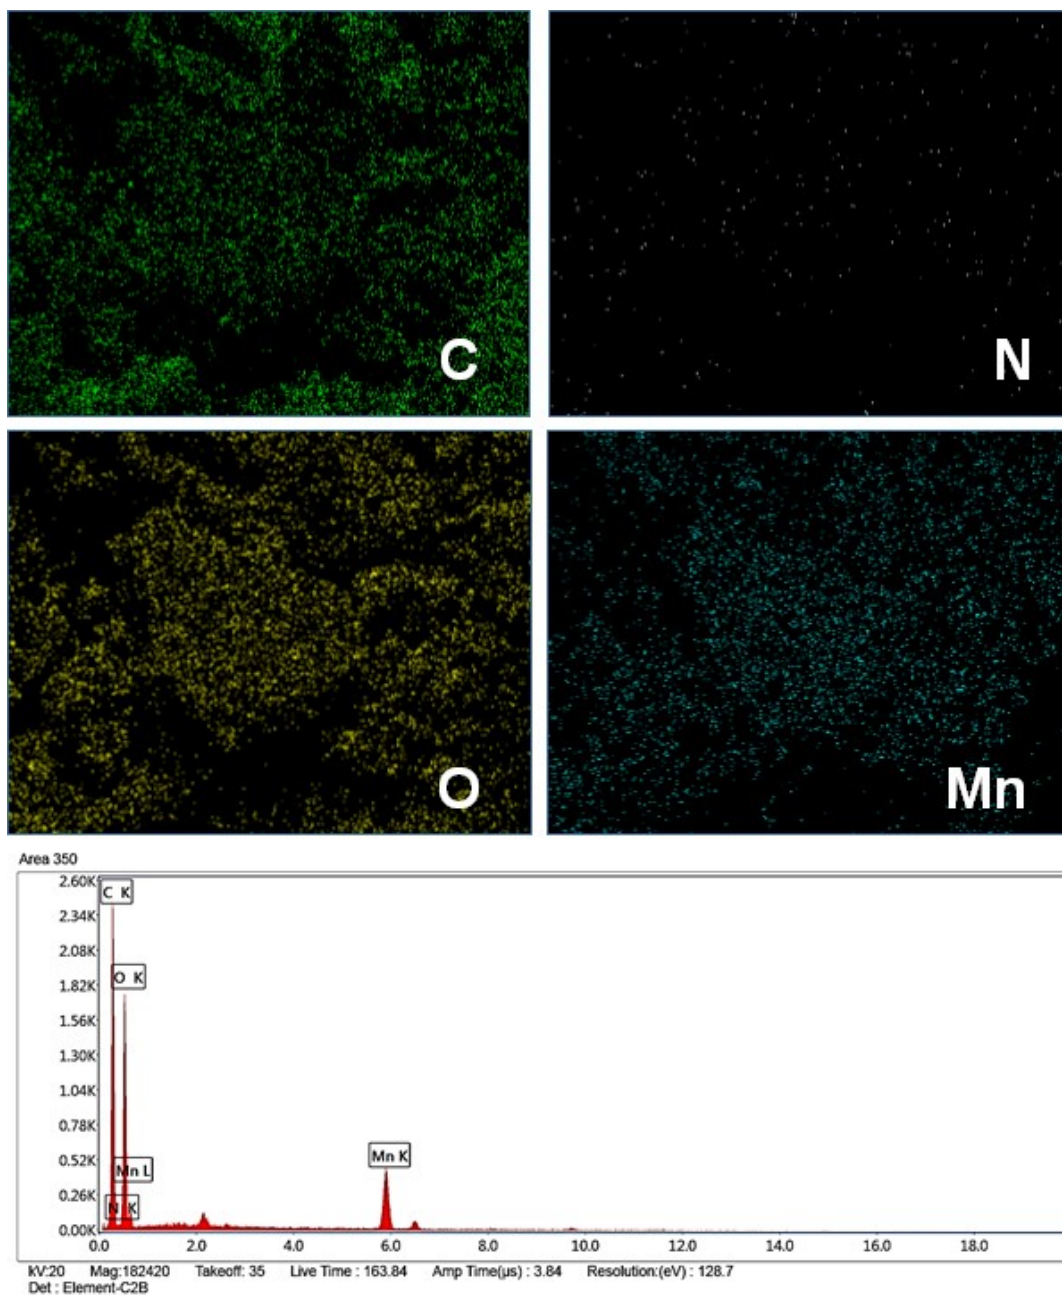

**Fig. S5** EDAX elemental mapping with spectrum of Mn-BDA metallogel.

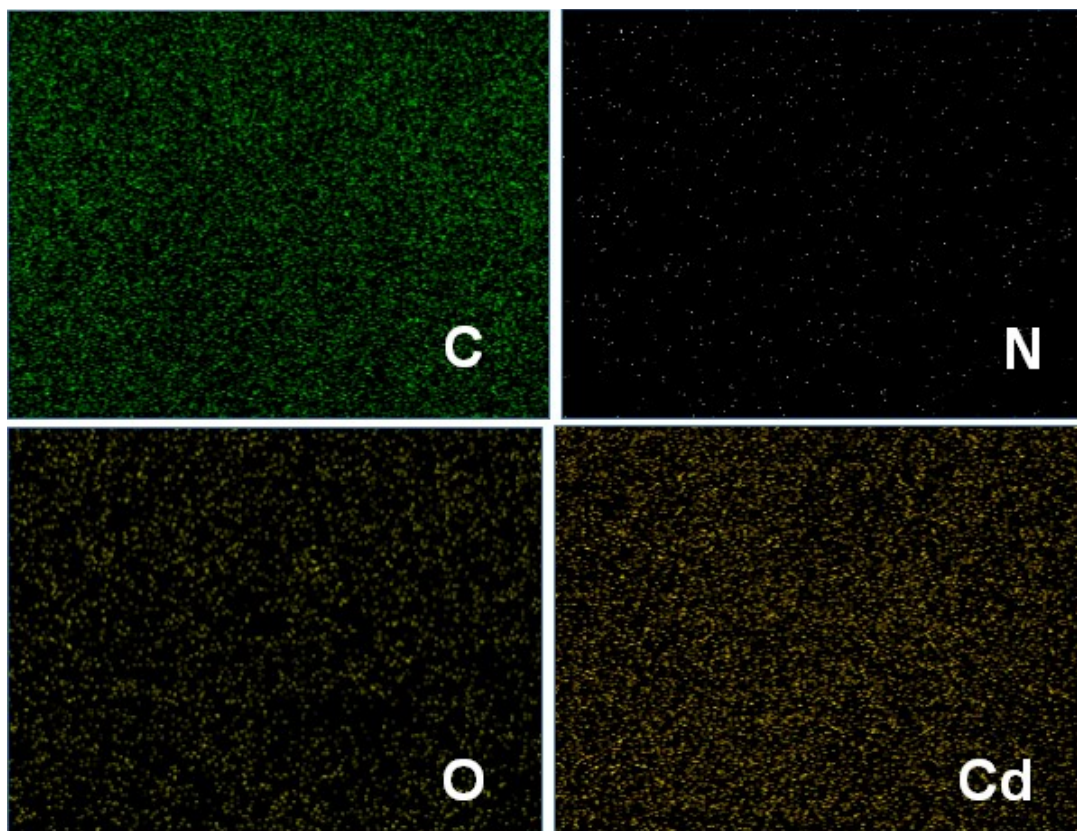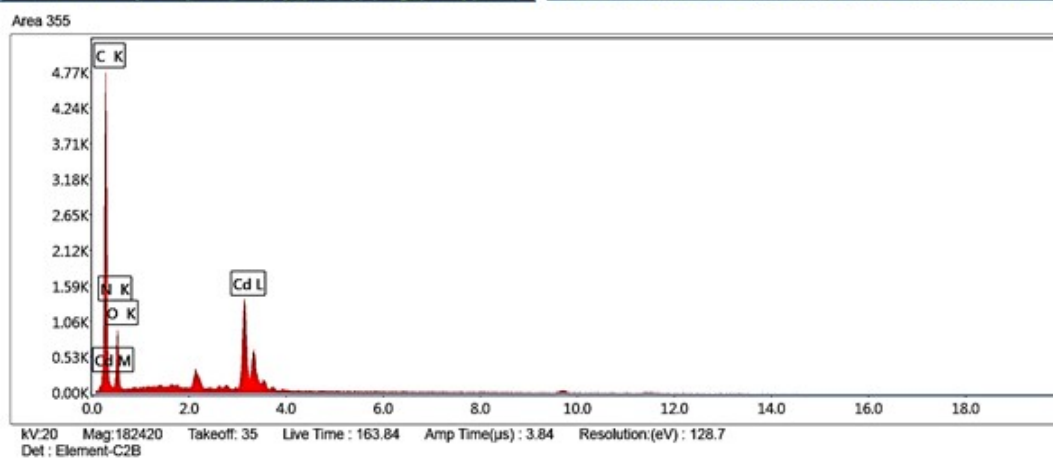

**Fig. S6** EDAX elemental mapping with spectrum of Cd-BDA metallogel.

#### 4. ESI-Mass analyses of Mn-BDA and Cd-BDA metallogels.

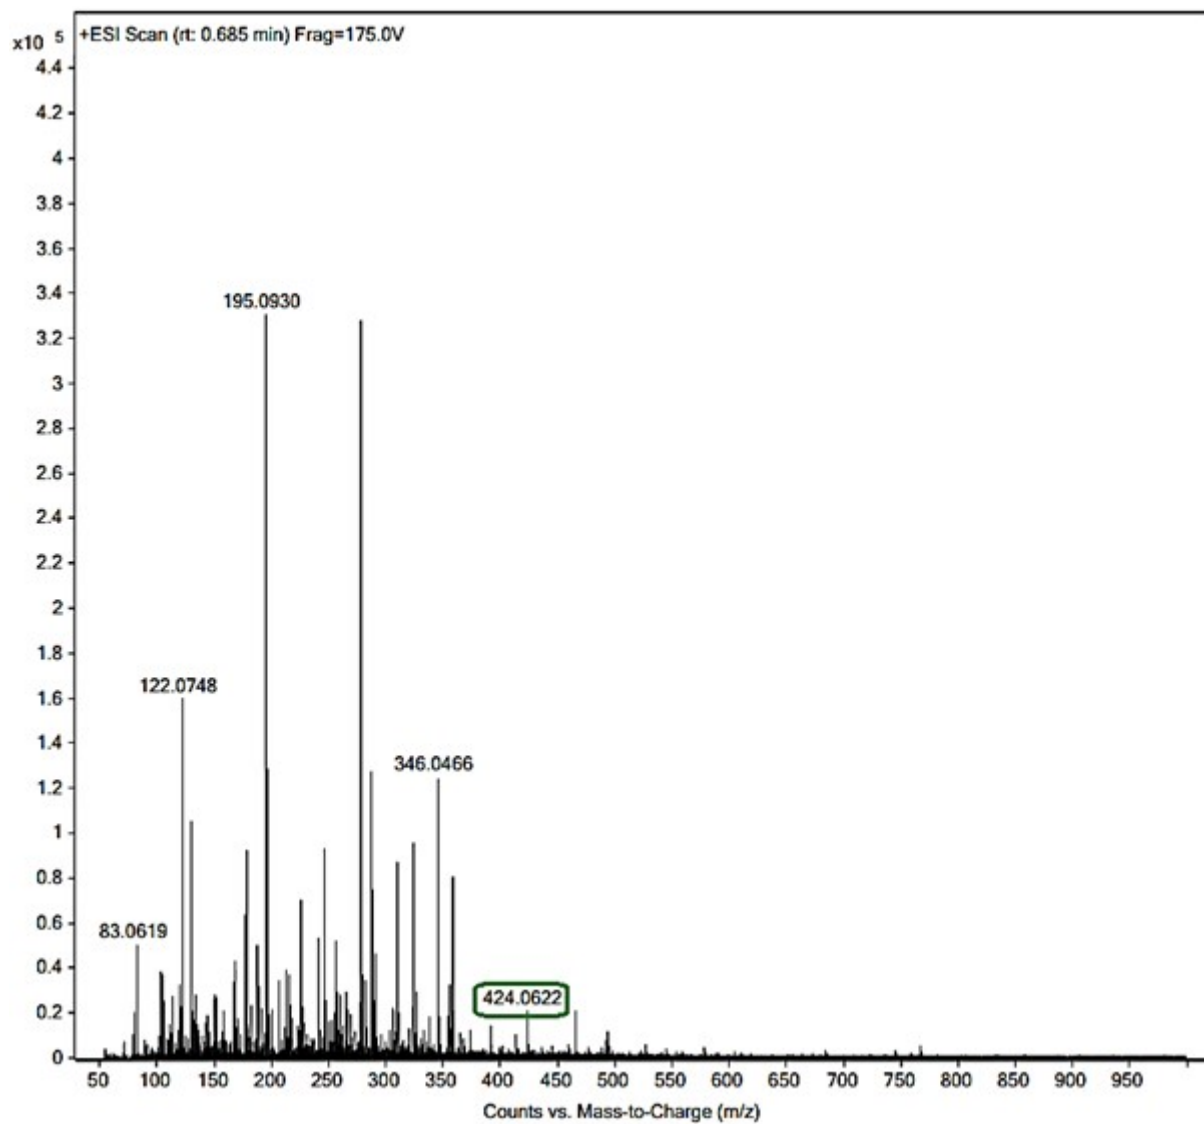

**Fig. S7** ESI-Mass Spectra of Mn-BDA metallogel.

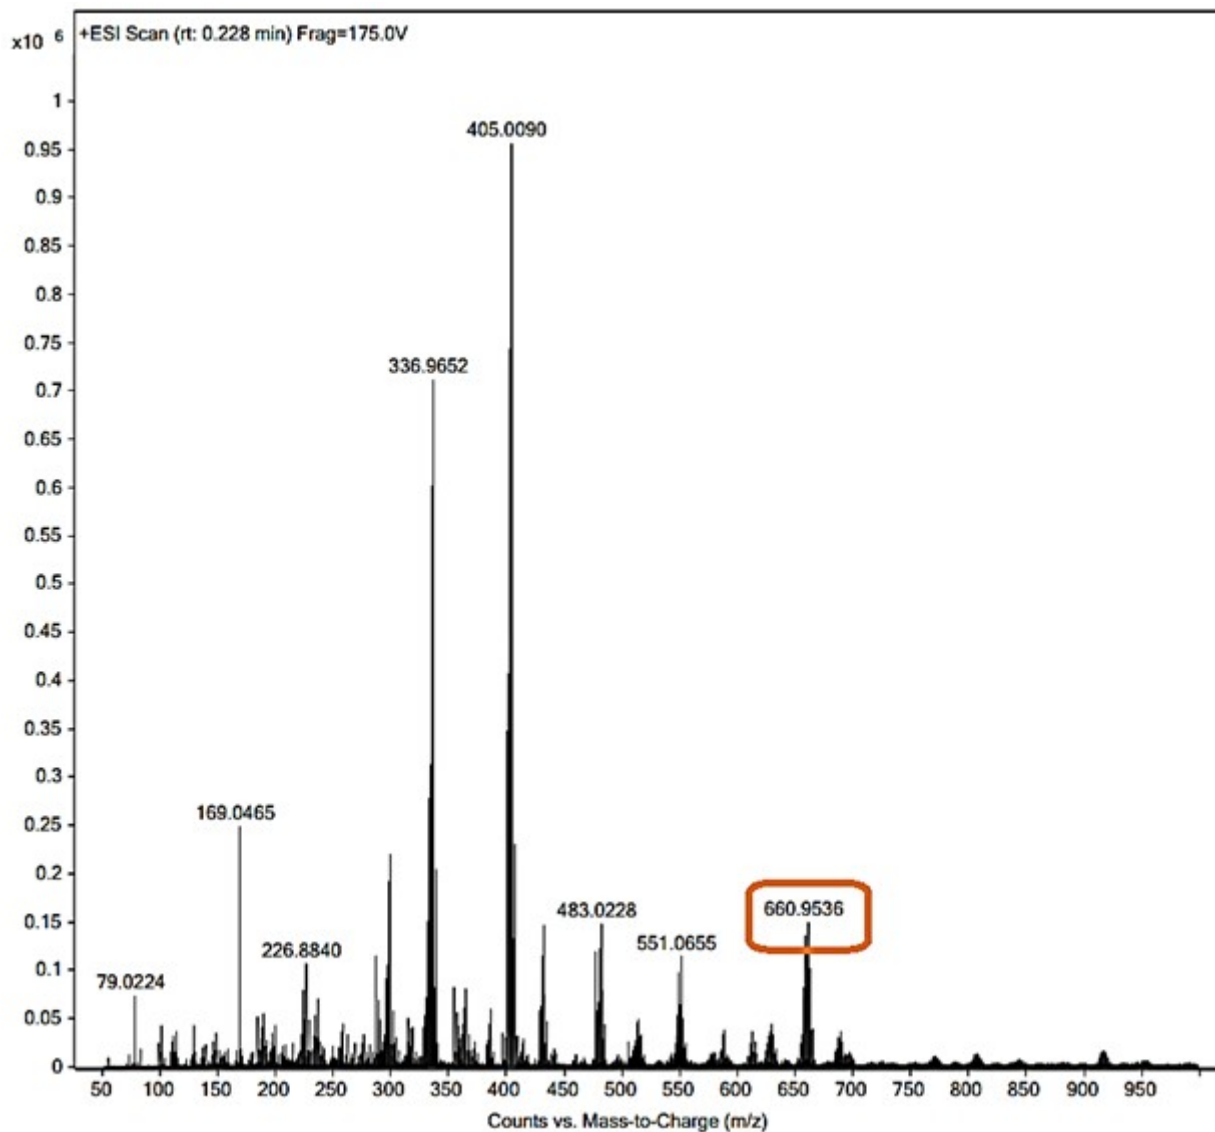

**Fig. S8** ESI-Mass Spectra of Cd-BDA metallogel.
